# Supplementary material for: The aromaticity of the phenyl ring imparts thermal stability to a supramolecular hydrogel obtained from low molecular mass compound
Source: Royal Society of Chemistry journal article supplement (doi:10.1039/c9nj01781j), 2019-01-01
Supplement: c9nj01781j1.pdf [file c9nj01781j1.pdf]

## Supporting Information

### Aromaticity of Phenyl Ring Imports the Thermal Stability to Supramolecular Hydrogel obtained from Low Molecular Weight Compound

Dhanya Mahalakshmi Murali,<sup>a</sup> and Ganesh Shanmugam,<sup>\*, a, b</sup>

<sup>a</sup>Organic & Bioorganic Chemistry Laboratory, Council of Scientific and Industrial Research-Central Leather Research Institute (CSIR-CLRI), Adyar, Chennai-600 020, India.

<sup>b</sup>Academy of Scientific and Innovative Research (AcSIR), CSIR-CLRI Campus, Adyar, Chennai-600 020, India.

---

\*Correspondence to

**Ganesh Shanmugam**, Senior Scientist, Organic & Bioorganic Chemistry Laboratory, CSIR-Central Leather Research Institute, Sardar Patel Road, Adyar, Chennai - 600 020, India. Email: ganesh@clri.res.in; ganeshclri@gmail.com Phone No: +91 44 24437223, Fax No: +91 44 24911589

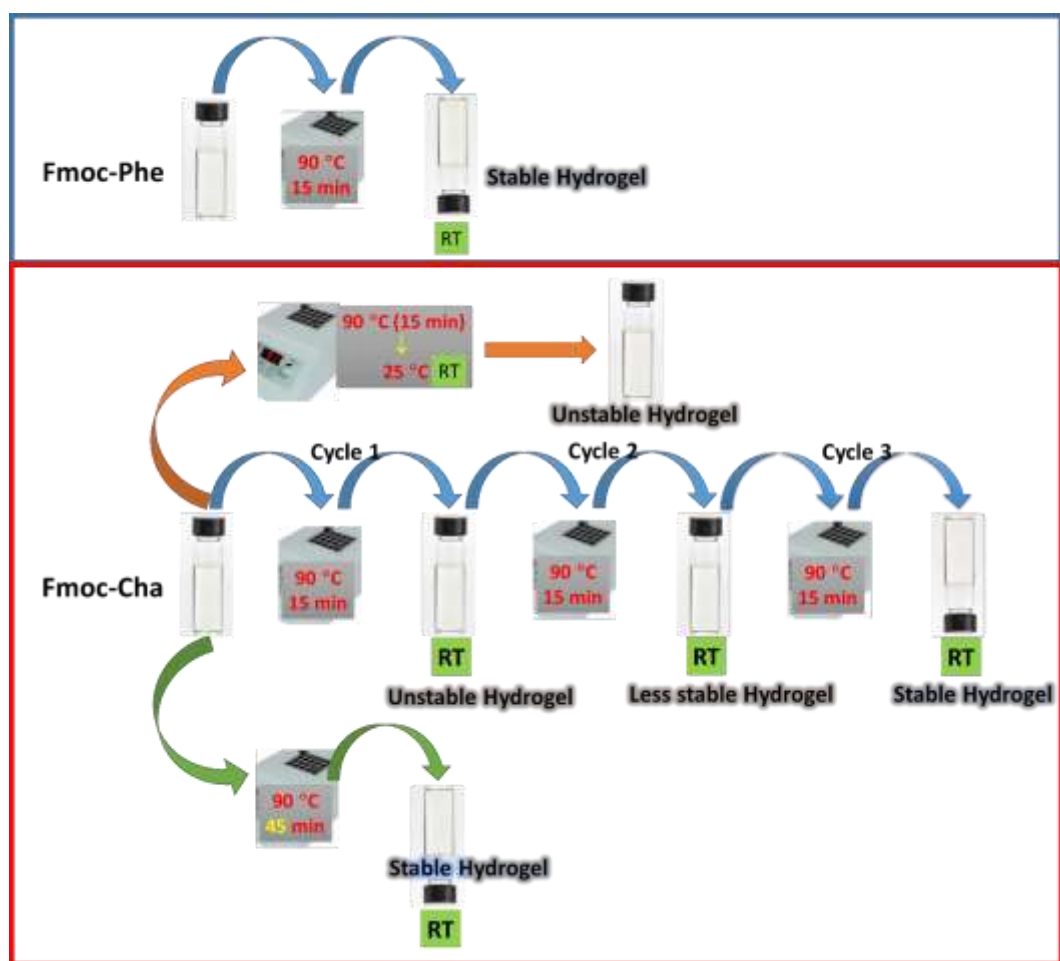

**Figure S1** A cartoon diagram illustrating the method employed for the hydrogelation of Fmoc-Phe (Top) and Fmoc-Cha (Bottom).

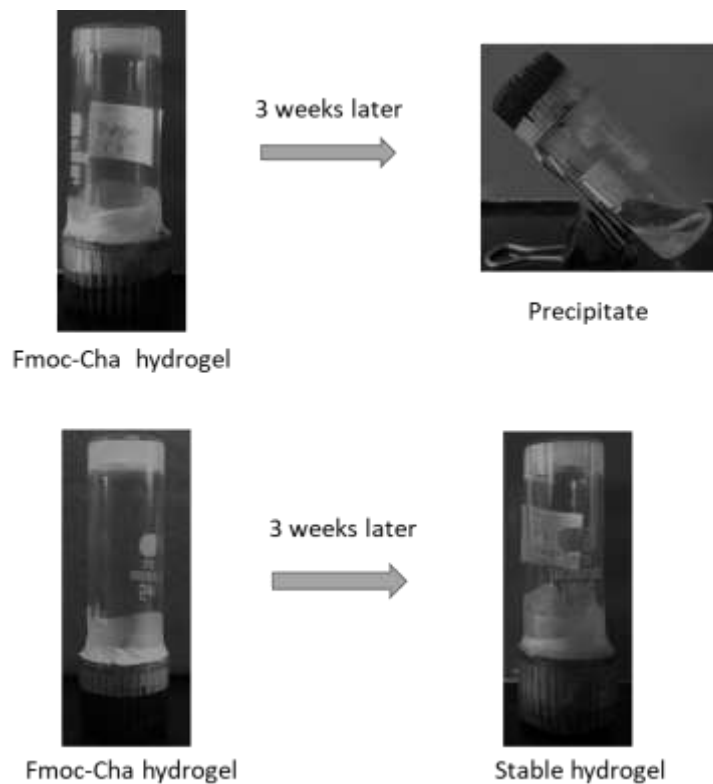

**Figure S2** (Top) Fmoc-Cha annealed hydrogel obtained after heating at 90 °C for 10 min followed by cooling to 27 °C in the dry block heater gradually (left) and after 3 weeks at RT (right). (Bottom) Digital images of Fmoc-Cha hydrogel obtained after heating at 90 °C for 45 min followed by cooling to 27 °C (left) and after 3 week incubation at RT (right).

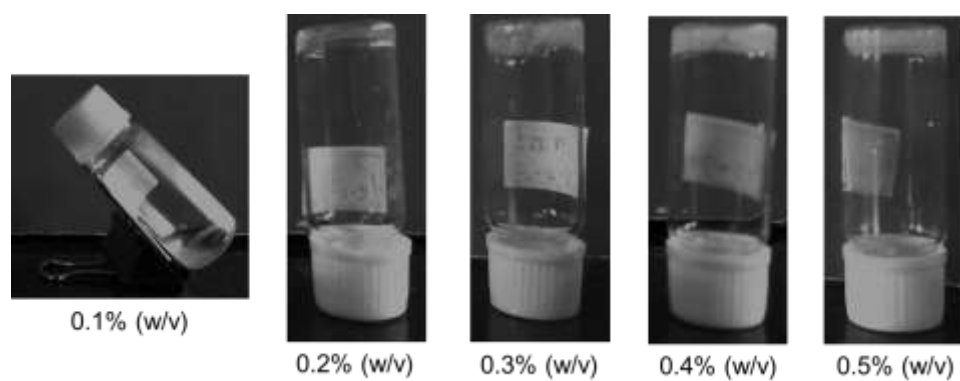

**Figure S3** Digital images (vial inverted) of Fmoc-Cha at different concentrations and after 3rd cycle annealing.

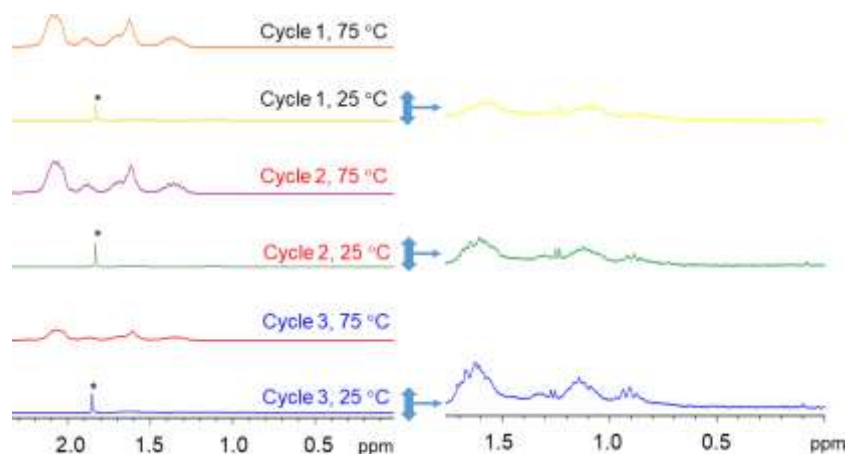

**Figure S4** (Left panel) Temperature dependent  $^1\text{H}$  NMR spectra (aliphatic region) of Fmoc-Cha at different annealing cycles. (Right panel) An expanded (Y-axis) spectra of corresponding spectra shown in left panel. \* Residual methyl proton of acetone (solvent impurity).

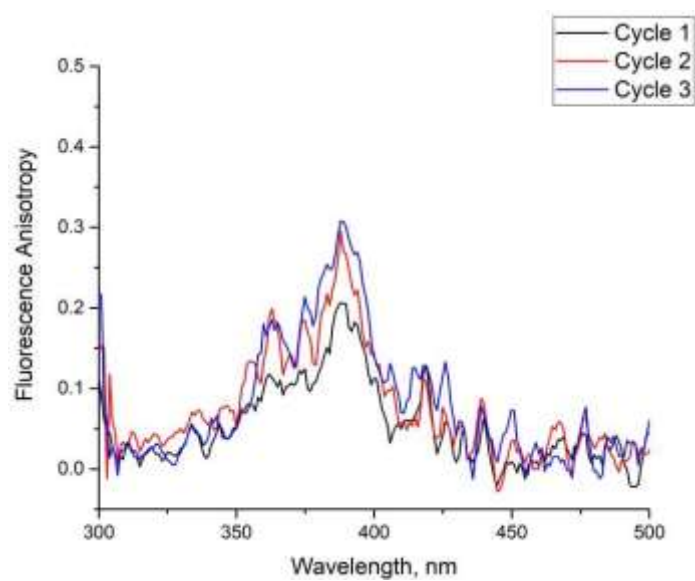

**Figure S5** Steady state fluorescence anisotropy of Fmoc-Cha hydrogels formed at different annealing cycles.
